# Supplementary material for: Sociospatial structure explains marked variation in brucellosis seroprevalence in an Alpine ibex population
Source: PubMed Central journal article supplement (PMC5688143; doi:10.1038/s41598-017-15803-w), 2017-11-15
Supplement: 41598_2017_15803_MOESM1_ESM.pdf [file 41598_2017_15803_MOESM1_ESM.pdf]

501 **Supplementary information**

502 **Sociospatial structure explains marked variation in brucellosis seroprevalence in**  
503 **an Alpine ibex population**

504 Pascal MARCHAND, Pauline FREYCON, Jean-Philippe HERBAUX, Yvette GAME, Carole TOIGO, Emmanuelle  
505 GILOT-FROMONT, Sophie ROSSI, Jean HARS

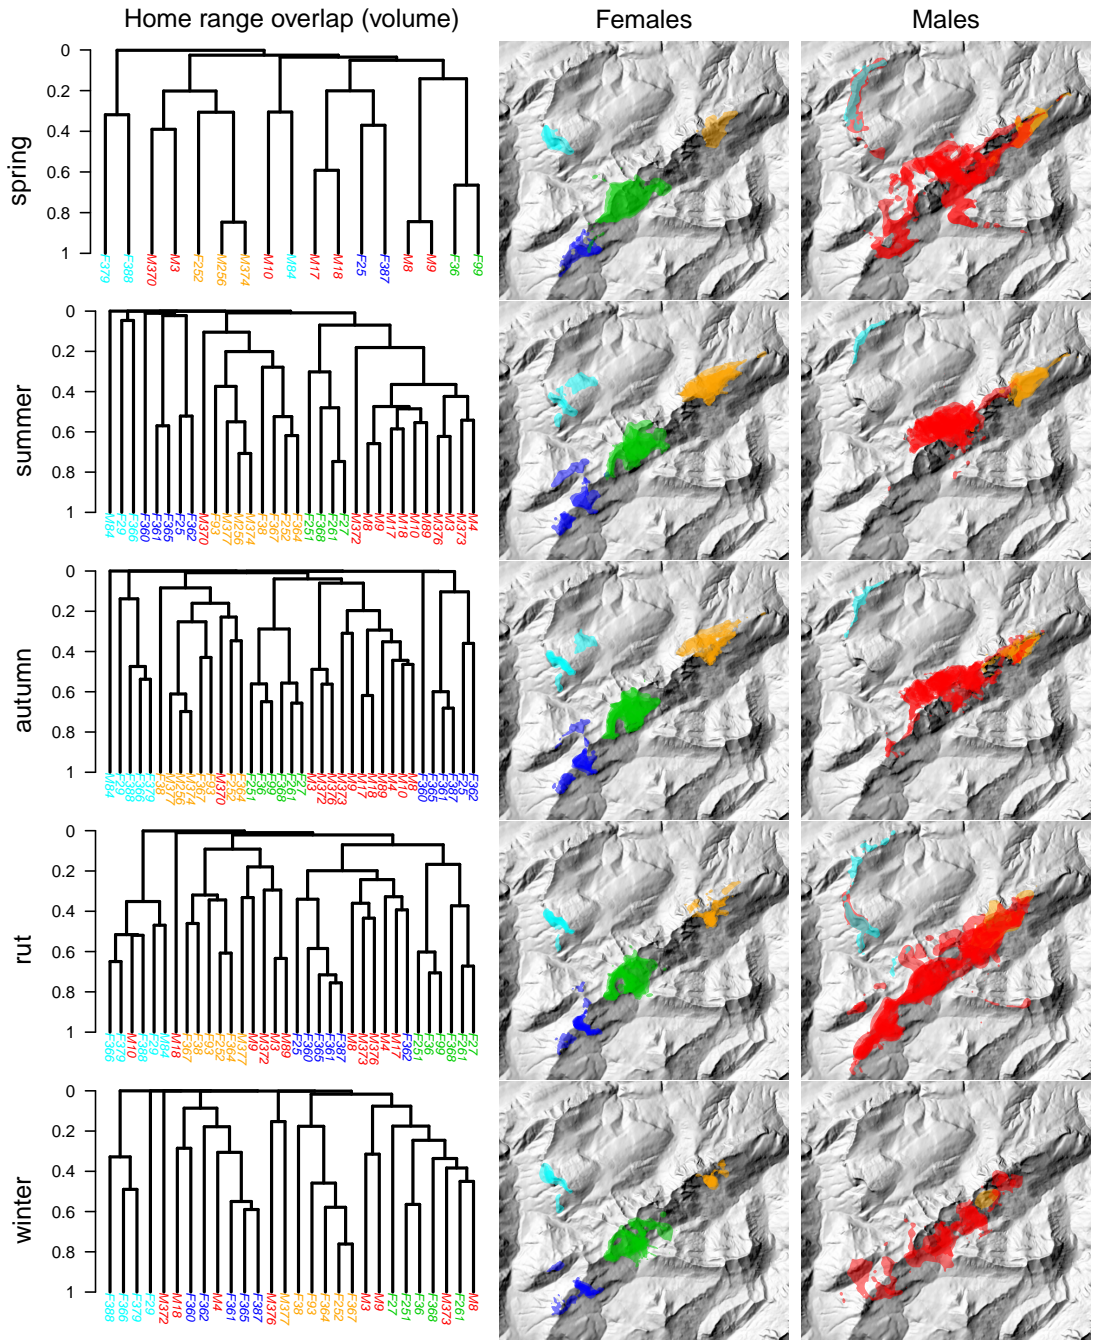

**Seasonal variation in space use and spatial structure in 37 GPS-collared Alpine ibex (*Capra ibex*) from the Bargy massif based on overlap between seasonal home ranges as a measure of distance between individuals.**

In order to evaluate the potential seasonal variation in the spatial structure we identified, we performed the same classification procedures as previously presented but using overlap between seasonal UD distinguishing spring (April-June), summer (July-August), autumn (September-09 November), the rutting period (“rut”; 10 November - 14 January) and winter (15 January - March). Only individuals monitored during at least half of the focal season are included in analyses. The corresponding home ranges are represented on sex-specific maps. Colors correspond to the different units identified using overlap between annual home ranges as a measure of distance between individuals (see Figure 1). These maps were created using R version 3.4.1<sup>80</sup>: <https://cran.r-project.org>.

507 **Supplementary information 2**

508 **Do the locations of 148 visually-marked individuals confirm the spatial structure identified in the 37 GPS-**  
509 **collared individuals ?**

510 To check whether the visual observations of the seronegative individuals marked with ear tags or collars allowing individual  
511 identification confirmed the existence of the spatial structure identified in the 37 GPS-collared individuals (see Figures 1 and 2  
512 for details), we assigned each visually-marked individual to the closest spatial unit based on its capture location (possible for  
513 n=148 individuals; number of individuals per sex and spatial unit are given in the figure after “n=”).

514 Then, for each spatial unit, we calculated the proportion of locations of individual assigned to a given unit that actually fell  
515 within the range used by GPS-collared females from the same unit (given in figure as “number of observations in the correct  
516 spatial range” / “total number of observations from individuals assigned to the focal unit” and as percentages).

517 We collected these locations in 2012-2015, during the snow-free season (May-September) by recording the composition  
518 (sex/age classes) of all the ibex groups observed, identity of marked individuals and by reporting group location on a 100×100m  
519 grid. We recorded most of these observations during the censuses that we repeated once a month between May and August,  
520 during which 1-2 observers travelled on 1 of the 9 tracks in the morning of a single day or 2 consecutive days.

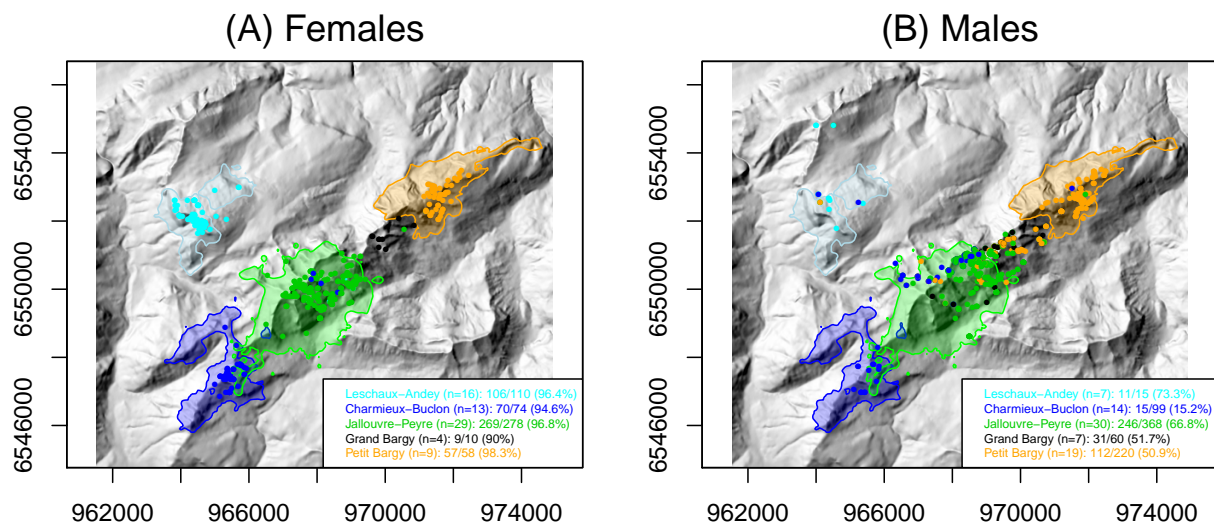

**Locations of observations from visually-marked Alpine ibex (A=71 females; B=77 males) and ranges used by the GPS-collared females (n=21) from the corresponding population unit in the Bargy massif (French Alps).**

These maps were created using R version 3.4.1<sup>80</sup>: <https://cran.r-project.org>.

### Supplementary information 3

#### Model selection table investigating how several classifications of males affect the ordering of models investigating brucellosis seroprevalence in the Alpine ibex (*Capra ibex*) population from the Barge massif (northern French Alps).

These models included either (i) the same sociospatial structure in both sexes (“unitsMFall”, i.e. individuals divided in units #1 to #5, same approach as that presented in the manuscript), (ii) a sex-specific sociospatial structure (“unitsMF”, i.e. females divided in units #1 to #5 and males divided in units #1, #2, #5 and #6 [unit #6 grouping males from units #3 and #4]), or (iii) a sociospatial structure only for females, males being considered a unique group not spatially structured (“unitsF”). In model acronyms, “+” corresponds to additive effects and “×” to the interaction between the 2 factors.  $k$  is the number of parameters, LL is the maximum log-likelihood,  $\Delta AIC_c$  is the difference in the Akaike information criterion between the model with the lowest  $AIC_c$  and the other models, and  $AIC_c$  weight is Akaike weight. “Age” and “sex” are ibex age (quadratic term) and sex, respectively. “Periods” opposed data collected before and after the slaughtering operations that occurred during autumn 2013 and early spring 2014.

| Model                           | k  | LL      | $AIC_c$ | $\Delta AIC_c$ | $AIC_c$ weight |
|---------------------------------|----|---------|---------|----------------|----------------|
| sex x age + unitsMFall          | 10 | -129.53 | 279.99  | 0.00           | 0.23           |
| sex + age + unitsMFall          | 8  | -131.84 | 280.28  | 0.29           | 0.20           |
| sex + age + unitsMF             | 9  | -131.15 | 281.07  | 1.08           | 0.13           |
| sex + age + unitsMFall + period | 9  | -131.31 | 281.38  | 1.39           | 0.11           |
| sex x age + unitsMFall + period | 11 | -129.17 | 281.47  | 1.47           | 0.11           |
| sex x age + unitsMF + period    | 11 | -129.21 | 281.54  | 1.55           | 0.10           |
| sex + age + unitsMF + period    | 10 | -130.66 | 282.25  | 2.25           | 0.07           |
| sex + age + unitsF              | 8  | -138.38 | 293.37  | 13.38          | 0.00           |
| sex + age + unitsF + period     | 9  | -137.69 | 294.14  | 14.15          | 0.00           |
| age x unitsF                    | 18 | -131.15 | 301.31  | 21.31          | 0.00           |
| age x unitsF + period           | 19 | -130.60 | 302.57  | 22.58          | 0.00           |
| sex x age + unitsMF             | 12 | -128.87 | 283.08  | 3.08           | 0.05           |
| null                            | 1  | -163.61 | 329.24  | 49.25          | 0.00           |

## Supplementary information 4

**Table 4.1.** Candidate models fitted to investigate variation in brucellosis seroprevalence in the Alpine ibex *Capra ibex* population from the Bargy massif (northern French Alps). In model acronyms, “+” corresponds to additive effects and “×” to the interaction between the 2 factors.  $k$  is the number of parameters, LL is the maximum log-likelihood,  $\Delta AIC_c$  is the difference in the Akaike information criterion between the model with the lowest  $AIC_c$  and the other models, and  $AIC_c$  weight is Akaike weight. “Age” and “sex” are ibex age (quadratic term) and sex, respectively. “UnitsMFall” are sociospatial population units (see Figure 1 and Supplementary information 1). “Periods” opposed data collected before and after the slaughtering operations that occurred during autumn 2013 and early spring 2014.

| Model                           | k  | LL      | $AIC_c$ | $\Delta AIC_c$ | $AIC_c$ weight |
|---------------------------------|----|---------|---------|----------------|----------------|
| unitsMFall + sex x age          | 10 | -129.53 | 279.99  | 0.00           | 0.27           |
| sex + age + unitsMFall          | 8  | -131.84 | 280.28  | 0.29           | 0.23           |
| age + unitsMFall                | 7  | -133.17 | 280.82  | 0.83           | 0.18           |
| unitsMFall + period + sex x age | 11 | -129.17 | 281.47  | 1.47           | 0.13           |
| unitsMFall + age + period       | 8  | -132.66 | 281.94  | 1.94           | 0.10           |
| sex + unitsMFall + age x period | 11 | -130.23 | 283.58  | 3.59           | 0.04           |
| unitsMFall + age x period       | 10 | -131.79 | 284.52  | 4.53           | 0.03           |
| sex + unitsMFall                | 6  | -138.18 | 288.72  | 8.72           | 0.00           |
| unitsMFall                      | 5  | -139.38 | 289.01  | 9.01           | 0.00           |
| sex + period + unitsMFall       | 7  | -137.60 | 289.68  | 9.69           | 0.00           |
| period + unitsMFall             | 6  | -138.81 | 289.97  | 9.98           | 0.00           |
| age x unitsMFall                | 15 | -128.98 | 290.05  | 10.06          | 0.00           |
| period x unitsMFall             | 10 | -135.17 | 291.28  | 11.28          | 0.00           |
| sex x unitsMFall                | 10 | -136.56 | 294.05  | 14.06          | 0.00           |
| sex + age                       | 4  | -155.63 | 319.43  | 39.44          | 0.00           |
| age                             | 3  | -156.99 | 320.09  | 40.09          | 0.00           |
| sex + age + period              | 5  | -155.28 | 320.82  | 40.82          | 0.00           |
| age + period                    | 4  | -156.59 | 321.35  | 41.36          | 0.00           |
| sex x age                       | 6  | -155.02 | 322.39  | 42.39          | 0.00           |
| sex + age x period              | 7  | -154.05 | 322.58  | 42.58          | 0.00           |
| age x period                    | 6  | -155.56 | 323.48  | 43.49          | 0.00           |
| sex                             | 2  | -162.11 | 328.28  | 48.28          | 0.00           |
| null                            | 1  | -163.61 | 329.24  | 49.25          | 0.00           |
| sex + period                    | 3  | -161.81 | 329.72  | 49.73          | 0.00           |
| period                          | 2  | -163.26 | 330.57  | 50.57          | 0.00           |
| sex x period                    | 4  | -161.78 | 331.74  | 51.74          | 0.00           |

## Supplementary information 5

### General information on the Alpine ibex *Capra ibex* equipped with GPS collars in the Bargy massif (French Alps) between 2013 and 2016.

“Begin” and “End” are the dates the GPS monitoring began and ended, respectively. “Nb. relocations” is the total number of relocations recorded by GPS collars during the monitoring duration.

| id    | Sex | Age (years) | Begin      | End        | Duration (days) | Nb. relocations |
|-------|-----|-------------|------------|------------|-----------------|-----------------|
| F-25  | F   | 11          | 2013-04-25 | 2014-01-01 | 250             | 5724            |
| F-29  | F   | 5           | 2013-05-10 | 2014-06-24 | 409             | 9313            |
| F-36  | F   | 4           | 2013-05-15 | 2015-07-02 | 777             | 16708           |
| F-27  | F   | 10          | 2013-05-23 | 2015-01-06 | 593             | 6985            |
| F-38  | F   | 5           | 2013-05-24 | 2014-05-06 | 346             | 7965            |
| F-93  | F   | 8           | 2013-06-06 | 2014-05-06 | 333             | 7545            |
| F-99  | F   | 2           | 2013-08-13 | 2016-02-12 | 913             | 10702           |
| F-252 | F   | 14          | 2014-06-20 | 2016-04-28 | 677             | 15075           |
| F-261 | F   | 2           | 2014-06-20 | 2016-01-09 | 568             | 6381            |
| F-251 | F   | 11          | 2014-06-27 | 2015-06-27 | 364             | 8417            |
| F-366 | F   | 4           | 2015-05-08 | 2016-04-11 | 338             | 7187            |
| F-364 | F   | 3           | 2015-05-12 | 2016-05-16 | 369             | 4238            |
| F-368 | F   | 2           | 2015-05-13 | 2016-05-02 | 354             | 7481            |
| F-367 | F   | 1           | 2015-05-18 | 2016-04-28 | 345             | 7900            |
| F-361 | F   | 10          | 2015-05-23 | 2016-04-15 | 327             | 7413            |
| F-362 | F   | 9           | 2015-05-28 | 2016-04-15 | 322             | 7212            |
| F-365 | F   | 6           | 2015-05-28 | 2016-04-21 | 328             | 7540            |
| F-360 | F   | 12          | 2015-06-03 | 2016-05-18 | 349             | 7637            |
| F-387 | F   | 8           | 2015-09-17 | 2016-05-29 | 255             | 2205            |
| F-379 | F   | 5           | 2015-09-19 | 2016-05-30 | 254             | 2219            |
| F-388 | F   | 4           | 2015-09-19 | 2016-05-30 | 254             | 1987            |
| M-18  | M   | 5           | 2013-04-27 | 2014-06-22 | 421             | 9732            |
| M-17  | M   | 5           | 2013-04-27 | 2014-11-24 | 576             | 10570           |
| M-3   | M   | 5           | 2013-04-30 | 2014-10-29 | 546             | 12572           |
| M-10  | M   | 8           | 2013-05-06 | 2014-02-08 | 278             | 6465            |
| M-9   | M   | 9           | 2013-05-09 | 2015-11-07 | 912             | 13921           |
| M-8   | M   | 6           | 2013-05-09 | 2015-12-02 | 937             | 12524           |
| M-84  | M   | 4           | 2013-05-10 | 2014-02-20 | 286             | 6466            |
| M-89  | M   | 11          | 2013-05-24 | 2015-01-28 | 614             | 8980            |
| M-256 | M   | 9           | 2015-05-07 | 2015-12-03 | 210             | 4165            |
| M-374 | M   | 11          | 2015-05-07 | 2015-11-13 | 190             | 4132            |
| M-373 | M   | 4           | 2015-05-07 | 2016-05-27 | 385             | 3206            |
| M-370 | M   | 8           | 2015-05-07 | 2015-12-12 | 219             | 2549            |
| M-376 | M   | 6           | 2015-05-08 | 2016-05-27 | 385             | 2825            |
| M-372 | M   | 9           | 2015-05-11 | 2016-05-07 | 361             | 9012            |
| M-377 | M   | 5           | 2015-05-12 | 2016-05-27 | 381             | 2088            |
| M-4   | M   | 7           | 2015-06-13 | 2016-05-30 | 351             | 3083            |
